# Supplementary material for: Ductal activation of oncogenic KRAS alone induces sarcomatoid phenotype
Source: PubMed Central journal article supplement (PMC4642517; doi:10.1038/srep13347), 2015-08-20
Supplement: srep13347-s1.pdf [file srep13347-s1.pdf]

# Ductal activation of oncogenic KRAS alone induces sarcomatoid phenotype

Yong Fu, Zobeida Cruz-Monserrate, H. Helen Lin, Yiyin Chung, Baoan Ji, Szu-min Lin, Steven Vonderfecht, Craig D. Logsdon, Chien-Feng Li, David K. Ann

## Supplementary Data

### Supplementary Figure Legends

**Supplementary Fig. S1. Pyrosequencing validation** confirms the presence of somatic KRAS A146T mutation featured by GCA>ACA in 12% tumor DNA submitted (**A**) and Q61H mutation showing CAA>CAC mutation in 9.5% (**B**), respectively.

**Supplementary Fig. S2. The experimental design for TAM gavage feeding and SMG harvesting.** TAM was gavaged for five consecutive days. Salivary gland and tumor were sampled at day-6, -9, -12, -15, and -24.

**Supplementary Fig. S3. Significant increase in leucocytes and macrophages infiltration in SMG tumors.** (**A**) Immunohistochemical staining for CD-45, Gr-1 and F4/80 is shown of SMGs in TAM-fed *LGL-KRas<sup>G12V</sup>;Ela-CreERT* mice on day-15 following tumor induction. (**B**) Mouse SMG sarcomatoid tumor cells were p63 (*top panel*)- and p40 (*middle panel*)-negative. The residual myoepithelium in SMGs served as the respective positive internal control (arrows). Consistent with Fig. 1, these oncogenic KRAS-expressing sarcomatoid tumor cells are negative for AR expression (*bottom panel*). Scale bar: 200  $\mu$ m.

**Supplementary Fig. S4. The histopathology of KRAS<sup>G12V</sup>-induced tumors.** (**A**) Multiple morphological manifestations during day-9 (*panel a, b*) and day-12 (*panels c-f*) suggested the ductal origin of the KRAS<sup>G12V</sup>-induced SMG tumors. Scale bars 20  $\mu$ m (*panels a - e*); 50  $\mu$ m (*panel f*). G: GCT; A: acini; S: sarcomatous element; SD: striated duct; ED: excretory duct. (**B**) Masson's trichrome staining for collagen deposition analysis of SMGs from *LGL-KRas<sup>G12V</sup>;Ela-CreERT* mice at 15-days post TAM-feeding.

**Supplementary Fig. S5. Early morphological manifestation reflecting tumorigenesis of SMGs.** Initial dysplasia (black arrow) was only observed in ductal cells near or at striated duct

(green arrow) in close proximity to blood vessel (red arrowhead) on day-9 post oncogenic KRAS induction. Five randomly selected images are shown. Scale bar: 100  $\mu\text{m}$  (*panels a - e*); 200  $\mu\text{m}$  (*panel f*).

**Supplementary Fig. S6. Abnormal parotid and sublingual salivary glands of Tam-fed LGL-KRas<sup>G12V</sup>;Ela-CreERT mice.** (**A**) Parotid tumors on day-18 post TAM-feeding. Advanced sarcomatoid carcinoma with necrosis (*panel a*, black arrow; scale bar: 200  $\mu\text{m}$ ), without recognizable structure (*panel b*; scale bar: 100  $\mu\text{m}$ ) and with typical sarcomatous changes (*panel c*; scale bar: 50  $\mu\text{m}$ ): high nucleus-to-cytoplasm ratio (*panel c*), giant and bizarre nucleus (*panel c*, black arrow), multiple nuclei (*panel c*, red arrow), and spindle cells (*panel c*, red arrowhead). (**B**) Sublingual tumors on day-15 post TAM-feeding. Dysplasia at striated ducts (*panel a*, black arrow; scale bar: 50  $\mu\text{m}$ ), microinvasive carcinoma (*panel b*, black arrow; scale bar: 50  $\mu\text{m}$ ), dysplasia at a striated duct (*panel c*, black arrow; scale bar: 20  $\mu\text{m}$ ).

**Supplementary Fig. S7. Close proximity of nuclear Ki-67-positive staining cell with blood vessel.** A dyad location of striated duct (green arrow) and a blood vessel (red arrowhead) to the nuclear Ki-67-positive staining cell in the striated duct (black arrow) on day-9. There was no Ki-67-positive staining in the adjacent region to blood vessel alone (red arrow). Scale bar: 100  $\mu\text{m}$ .

**Supplementary Fig. S8. Gland/tumor weight measured on day-24 post TAM-feeding.** (**A**) Tumor weight is significantly different between female and male mice on day-24 post TAM-feeding. 5 mice of the same age were included in each group. (**B**) Statistic analysis shows a significant increase of gland weight comparing to vehicle-fed control. However, cetuximab treatment did not significantly reduce tumor size. Data is shown as mean  $\pm$  SD,  $n \geq 3$ . Data is analyzed with Graphpad Prism 6 using non-parametric Mann-Whitney test. \*:  $p < 0.05$ , \*\*:  $p < 0.01$ . (**C**) Cetuximab fails to inhibit SMG tumor cell colony formation *in vitro*. Tumor cells isolated from day-23 SMG tumors were seeded on 6-well plates at a density of 1000 cells per well and treated with cetuximab (200  $\mu\text{g}/\text{ml}$ ) for 5-days. One set of representative images is shown. Quantification of colony numbers is shown as mean  $\pm$  SD of three independent experiments. (**D**) Cetuximab inhibits EGF-induced Akt and ERK signaling *in vitro*. SMG tumor cells were maintained under a serum-starved condition (DMEM with 2% FBS) in the presence or absence of cetuximab (200  $\mu\text{g}/\text{ml}$ ) for 72-hours. Cells were then challenged with EGF (100  $\text{ng}/\text{ml}$ ) for 5-minutes prior to cell lysis and Western blot analyses. One representative Western blot is shown. (**E**) Cetuximab does not inhibit Akt and ERK signaling in SMG tumor cells *in vitro*. Isolated tumor

cells cultured under normal growth conditions were treated with cetuximab (200 µg/ml) for 48- or 72-hours and subjected to Western blot analyses as indicated. One representative Western blot is shown.

Supplementary Table S1. Detectable *EGFR* and *KRAS* mutations in Sequenom OncoFOCUS Panel

| Gene Name   | No. of mutation type detected | Types of mutations                                                                                                                                                                                                                                                                                                                                                                                                                                                                                                                                                                                                                                                                                                                                                                                                                                                                                                                                                                                                                                                                                                                                                                                                                                                                                                                                                                                                                                                                                                                                                                                                                  |
|-------------|-------------------------------|-------------------------------------------------------------------------------------------------------------------------------------------------------------------------------------------------------------------------------------------------------------------------------------------------------------------------------------------------------------------------------------------------------------------------------------------------------------------------------------------------------------------------------------------------------------------------------------------------------------------------------------------------------------------------------------------------------------------------------------------------------------------------------------------------------------------------------------------------------------------------------------------------------------------------------------------------------------------------------------------------------------------------------------------------------------------------------------------------------------------------------------------------------------------------------------------------------------------------------------------------------------------------------------------------------------------------------------------------------------------------------------------------------------------------------------------------------------------------------------------------------------------------------------------------------------------------------------------------------------------------------------|
| <b>EGFR</b> | 128                           | A289D, A289V, A767_S768insTLA, D761N, D761Y, D770_N771>AGG, D770_N771insAPW, D770_N771insG, D770_N771insGD, D770_N771insGF, D770_N771insGL, D770_N771insMATP (5'Detection Only), D770_N771insSVD, D770_P772>ASVDNR, D770>GY, D770N,E709A, E709fs*1, E709G, E709H, E709K, E709Q, E709V, E746_A750>DP, E746_A750>IP, E746_A750>QP, E746_A750>RP, E746_A750>VP, E746_A750delELREA, E746_E749del, E746_E749delELRE, E746_P753>IS, E746_P753>LS, E746_P753>VQ, E746_P753>VS, E746_S752>A, E746_S752>D, E746_S752>I, E746_S752>V,E746_S752delELREATS, E746_T751>A, E746_T751>I, E746_T751>IP, E746_T751>L, E746_T751>Q, E746_T751>S, E746_T751>V, E746_T751>VA, E746_T751>VP, E746_T751delELREAT, E746K, E746V, G598V, G719A, G719C, G719D, G719S, H773_V774insH, H773_V774insNPH, H773_V774insPH, H773_V774insQ, H773>NPY(3' Detection Only), I759N, K745_E749delKELRE, L747_A750>P, L747_A755>AN, L747_E749del, L747_E749delLRE, L747_K754>ST, L747_K754delLREATSPK, L747_P753>Q, L747_P753>S, L747_S752>Q, L747_S752>QH, L747_S752delLREATS, L747_T751>A , L747_T751>P, L747_T751>PT, L747_T751>Q, L747_T751>S, L747_T751del, L747_T751delLREAT, L747P, L747S, L858K, L858M, L858R, L861Q, L861R, M766_A767insAI, N771_P772>SVDNR, N771_P772insRH, N771>GF, N771>GY,N771>SH, N771>TH, P753_I759del, P753_I759delPKANKEI, P753Q, P753S, R108K, R776C, R776H, S752_I759delSPKANKEI, S752P, S752Y, S768_V769>IL, S768I, S768N, S768T, T263P, T751_E758delTSPKANKE, T751_I759>N, T751_I759>REA, T751_I759>S, T751fs*4, T751I, T790M, T854A,V769_D770insASV, V769_D770insCV, V769_D770insGSV, V769_D770insGVV, V774_C775insHV, V774L, V774M |
| <b>KRAS</b> | 37                            | A146G, A146P, <b>A146T</b> , A146V, A59T, G12A, G12C, G12D, G12E, G12F, G12G, G12I, G12L, G12N, G12P, G12R, G12S,G12T, G12V, G12W, G12Y, G12_G13insA, G13_V14insG, G13A, G13C, G13D, G13I, G13N, G13R, G13S, G13V, Q61E, <b>Q61H</b> , Q61K, Q61L, Q61P, Q61R                                                                                                                                                                                                                                                                                                                                                                                                                                                                                                                                                                                                                                                                                                                                                                                                                                                                                                                                                                                                                                                                                                                                                                                                                                                                                                                                                                       |
| <b>NRAS</b> | 20                            | G12A, G12C, G12E, G12N, G12P, G12V, G12Y, G13A, G13D, G13N, G13R, G13V, G13Y, Q61E, Q61H, Q61K, Q61L, Q61P, Q61Q, Q61R                                                                                                                                                                                                                                                                                                                                                                                                                                                                                                                                                                                                                                                                                                                                                                                                                                                                                                                                                                                                                                                                                                                                                                                                                                                                                                                                                                                                                                                                                                              |
| <b>BRAF</b> | 19                            | D594G, D594V, G469A, G469E, G469R, G469S, G469V, L597Q, L597R, L597S, L597V, T599_V600insT, T599_V600insTT,V600E, V600K, V600L, V600M, V600R, V600>YM                                                                                                                                                                                                                                                                                                                                                                                                                                                                                                                                                                                                                                                                                                                                                                                                                                                                                                                                                                                                                                                                                                                                                                                                                                                                                                                                                                                                                                                                               |

**A**

**SDC-05 KRAS p.A146T**



**B**

**SDC-11 KRAS p.Q61H**



## Experimental Protocol

*LGL-KRas<sup>G12V</sup>;Ela-CreERT*



**A**

**Day-15**

**CD-45**



**Gr-1**



**F4/80**



**B**

**Day-15**

**p63**



**p40**



**AR**



**A**



**B**

**Trichrome Staining**





Supplementary  
Figure S5

**A**

**Parotid**



**B**

**Sublingual**





Supplementary  
Figure S7

**A****B****C****D****E**
